# Supplementary material for: Comparative Analysis of the Simian Varicella Virus and Varicella Zoster Virus Genomes
Source: MDPI journal article supplement (doi:10.3390/v14050844), 2022-04-19
Supplement: s1 [file s1]

**Supplemental Table S1. SVV and VZV open reading frames.**

| ORF <sup>1</sup> | SVV<br>Size (aa) | SVV<br>Size(kDa) <sup>2</sup> | SVV/ VZV<br>% homology <sup>3</sup> | VZV<br>Size (aa) <sup>2</sup> | HSV-1<br>homolog | Putative Function <sup>4</sup> /Notes                 |
|------------------|------------------|-------------------------------|-------------------------------------|-------------------------------|------------------|-------------------------------------------------------|
| C                | 123              | 13.5                          | ----                                | ----                          | UL56             | Paralog of ORF 0 (B),<br>Membrane protein             |
| A                | 293              | 33.5                          | ----                                | ----                          | UL54             | Truncated paralog of ORF 4                            |
| 0 (B)            | 114              | 12.7                          | 29.9                                | 157-224                       | UL56             | DNA cleavage and packaging                            |
| 1                | 101              | 11.7                          | 27.3                                | 108                           | None             | Membrane protein                                      |
| 2                | ----             | ----                          | ----                                | 238                           | None             | VZV membrane protein, no<br>SVV homolog               |
| 3                | 183              | 19.7                          | 63.7                                | 179                           | UL55             | Virion assembly                                       |
| 4                | 470              | 54.3                          | 43.2                                | 452                           | UL54             | Transcriptional activator,<br>immediate early protein |
| 5                | 337              | 42.0                          | 59.3                                | 340                           | UL53             | Glycoprotein K                                        |
| 6                | 1081             | 123.3                         | 37.7                                | 1083                          | UL52             | Component of DNA helicase-<br>primase complex         |
| 7                | 231              | 25.3                          | 72.9                                | 259                           | UL51             | Virion phosphoprotein                                 |
| 8                | 395              | 44.9                          | 38.2                                | 396                           | UL50             | DeoxyUTPase                                           |
| 9A               | 87               | 9.7                           | 68.8                                | 87                            | UL49A            | Glycoprotein N                                        |
| 9                | 301              | 33.2                          | 59.4                                | 302                           | UL49             | Tegument protein                                      |
| 10               | 406              | 46.6                          | 62.5                                | 410                           | UL48             | Transcriptional activator,<br>tegument protein        |
| 11               | 642              | 71.7                          | 50.8                                | 819                           | UL47             | Tegument protein                                      |
| 12               | 655              | 73.4                          | 60.1                                | 661                           | UL46             | Tegument protein                                      |
| 13               | 295              | 33.9                          | 71.1                                | 301                           | None             | Thymidylate synthetase                                |
| 14               | 540              | 60.6                          | 43.8                                | 560                           | UL44             | Glycoprotein C                                        |
| 15               | 421              | 47.3                          | 36.2                                | 406                           | UL43             | Membrane protein                                      |
| 16               | 385              | 42.8                          | 46.8                                | 408                           | UL42             | Associated with DNA polymerase                        |
| 17               | 471              | 53.6                          | 55.0                                | 455                           | UL41             | Host shutoff virion protein                           |
| 18               | 311              | 36.2                          | 72.6                                | 306                           | UL40             | Ribonucleotide reductase, small subunit               |
| 19               | 783              | 88.2                          | 68.7                                | 775                           | UL39             | Ribonucleotide reductase, large subunit               |
| 20               | 467              | 52.9                          | 60.5                                | 483                           | UL38             | Capsid protein                                        |
| 21               | 1041             | 116.8                         | 52.0                                | 1038                          | UL37             | Tegument protein                                      |
| 22               | 2653             | 294.8                         | 48.9                                | 2763                          | UL36             | Tegument protein                                      |

|       |      |       |      |      |      |                                                 |
|-------|------|-------|------|------|------|-------------------------------------------------|
|       |      |       |      |      |      |                                                 |
| 23    | 228  | 23.8  | 47.3 | 235  | UL35 | Capsid protein                                  |
| 24    | 214  | 23.9  | 61.5 | 269  | UL34 | Membrane phosphoprotein                         |
| 25    | 153  | 17.4  | 45.2 | 156  | UL33 | Viral DNA cleavage/packaging                    |
| 26    | 572  | 65.1  | 61.3 | 585  | UL32 | DNA cleavage/packaging                          |
| 27    | 310  | 35.4  | 74.4 | 333  | UL31 | Nuclear phosphoprotein                          |
| 28    | 1172 | 113.2 | 65.7 | 1194 | UL30 | DNA polymerase                                  |
| 29    | 1194 | 132.0 | 71.9 | 1204 | UL29 | Single-stranded DNA binding protein             |
| 30    | 760  | 86.5  | 61.3 | 770  | UL28 | Viral DNA cleavage/packaging                    |
| 31    | 916  | 104.0 | 75.4 | 868  | UL27 | Glycoprotein B                                  |
| 32    | 135  | 15.0  | 49.6 | 143  | None | Phosphoprotein                                  |
| 33    | 588  | 65.1  | 64.4 | 605  | UL26 | Protease, capsid assembly protein               |
| 34    | 579  | 65.7  | 61.1 | 579  | UL25 | Viral DNA cleavage/packaging                    |
| 35    | 248  | 28.7  | 49.7 | 258  | UL24 | Membrane protein                                |
| 36    | 337  | 37.9  | 52.3 | 341  | UL23 | Thymidine kinase                                |
| 37    | 852  | 96.8  | 55.5 | 841  | UL22 | Glycoprotein H                                  |
| 38    | 533  | 59.8  | 60.3 | 541  | UL21 | Virion protein                                  |
| 39    | 223  | 25.4  | 53.1 | 240  | UL20 | Envelope protein, viral egress                  |
| 40    | 1392 | 155.9 | 73.3 | 1396 | UL19 | Major capsid protein                            |
| 41    | 315  | 34.3  | 70.5 | 316  | UL18 | Capsid protein                                  |
| 42/45 | 744  | 84.1  | 67.7 | 747  | UL15 | Spliced product <sup>5</sup><br>Viral terminase |
| 43    | 678  | 75.9  | 47.3 | 676  | UL17 | Viral DNA cleavage/packaging                    |
| 44    | 360  | 39.8  | 69.3 | 363  | UL16 | Virion protein                                  |
| 46    | 199  | 22.5  | 58.2 | 199  | UL14 | Tegument protein                                |
| 47    | 507  | 57.7  | 64.8 | 510  | UL13 | Protein Kinase                                  |
| 48    | 509  | 57.8  | 56.2 | 551  | UL12 | Deoxyribonuclease                               |
| 49    | 82   | 9.2   | 50.0 | 81   | UL11 | Myristylated virion protein                     |
| 50    | 439  | 49.5  | 57.5 | 435  | UL10 | Glycoprotein M                                  |

|    |      |       |      |      |      |                                                               |
|----|------|-------|------|------|------|---------------------------------------------------------------|
| 51 | 816  | 92.8  | 53.7 | 835  | UL9  | Origin binding protein                                        |
| 52 | 765  | 86.0  | 50.4 | 771  | UL8  | Component of DNA helicase-primase complex                     |
| 53 | 304  | 34.5  | 56.6 | 331  | UL7  | Cytoplasmic envelope protein, viral egress                    |
| 54 | 735  | 83.5  | 59.5 | 769  | UL6  | Viral DNA cleavage/packaging                                  |
| 55 | 869  | 97.8  | 75.2 | 881  | UL5  | Component of DNA helicase-primase complex                     |
| 56 | 187  | 21.3  | 37.7 | 244  | UL4  | Nuclear protein                                               |
| 57 | 72   | 8.2   | 39.5 | 71   | None | Nonessential VZV protein                                      |
| 58 | 203  | 22.9  | 42.0 | 221  | UL3  | Phosphoprotein                                                |
| 59 | 300  | 34.6  | 55.4 | 305  | UL2  | Uracil DNA glycosylase                                        |
| 60 | 175  | 20.2  | 43.5 | 159  | UL1  | Glycoprotein L                                                |
| 61 | 503  | 54.1  | 42.8 | 467  | RL2  | Transcriptional activator, repressor, immediate early protein |
| 62 | 1279 | 136.8 | 58   | 1310 | RS1  | Transcriptional activator, immediate early protein            |
| 63 | 261  | 29.3  | 52   | 278  | US1  | Transcriptional activator, Immediate early protein            |
| 64 | 187  | 21.1  | 56   | 180  | US10 | Tegument phosphoprotein                                       |
| 65 | 77   | 9.0   | 49   | 102  | US9  | Tegument phosphoprotein                                       |
| 66 | 345  | 38.9  | 66   | 393  | US3  | Protein Kinase                                                |
| 67 | 353  | 40.5  | 37   | 354  | US7  | Glycoprotein I                                                |
| 68 | 604  | 67.6  | 47   | 623  | US8  | Glycoprotein E                                                |
| 69 | 187  | 21.1  | 56   | 180  | US10 | Duplicate of ORF 64                                           |
| 70 | 261  | 29.3  | 52   | 278  | US1  | Duplicate of ORF 63                                           |
| 71 | 1279 | 136.8 | 58   | 1310 | ICP4 | Duplicate of ORF 62                                           |

<sup>1</sup> SVV ORFs derived from *Gray et al.* (2001) [10]. VZV ORFs derived from *Davison and Scott* (1986) [11].

<sup>2</sup> Predicted size based on amino acid sequence.

<sup>3</sup> Based on % amino acid identity between homologous SVV and VZV proteins

<sup>4</sup> Based on known function or function of HSV-1 homolog

<sup>5</sup> Predicted spliced gene including ORF 42 and 45 exons
